# Supplementary material for: Multivalency ensures persistence of a +TIP body at specialized microtubule ends
Source: PubMed Central journal article supplement (PMC9859758; doi:10.1038/s41556-022-01035-2), 2022-12-19

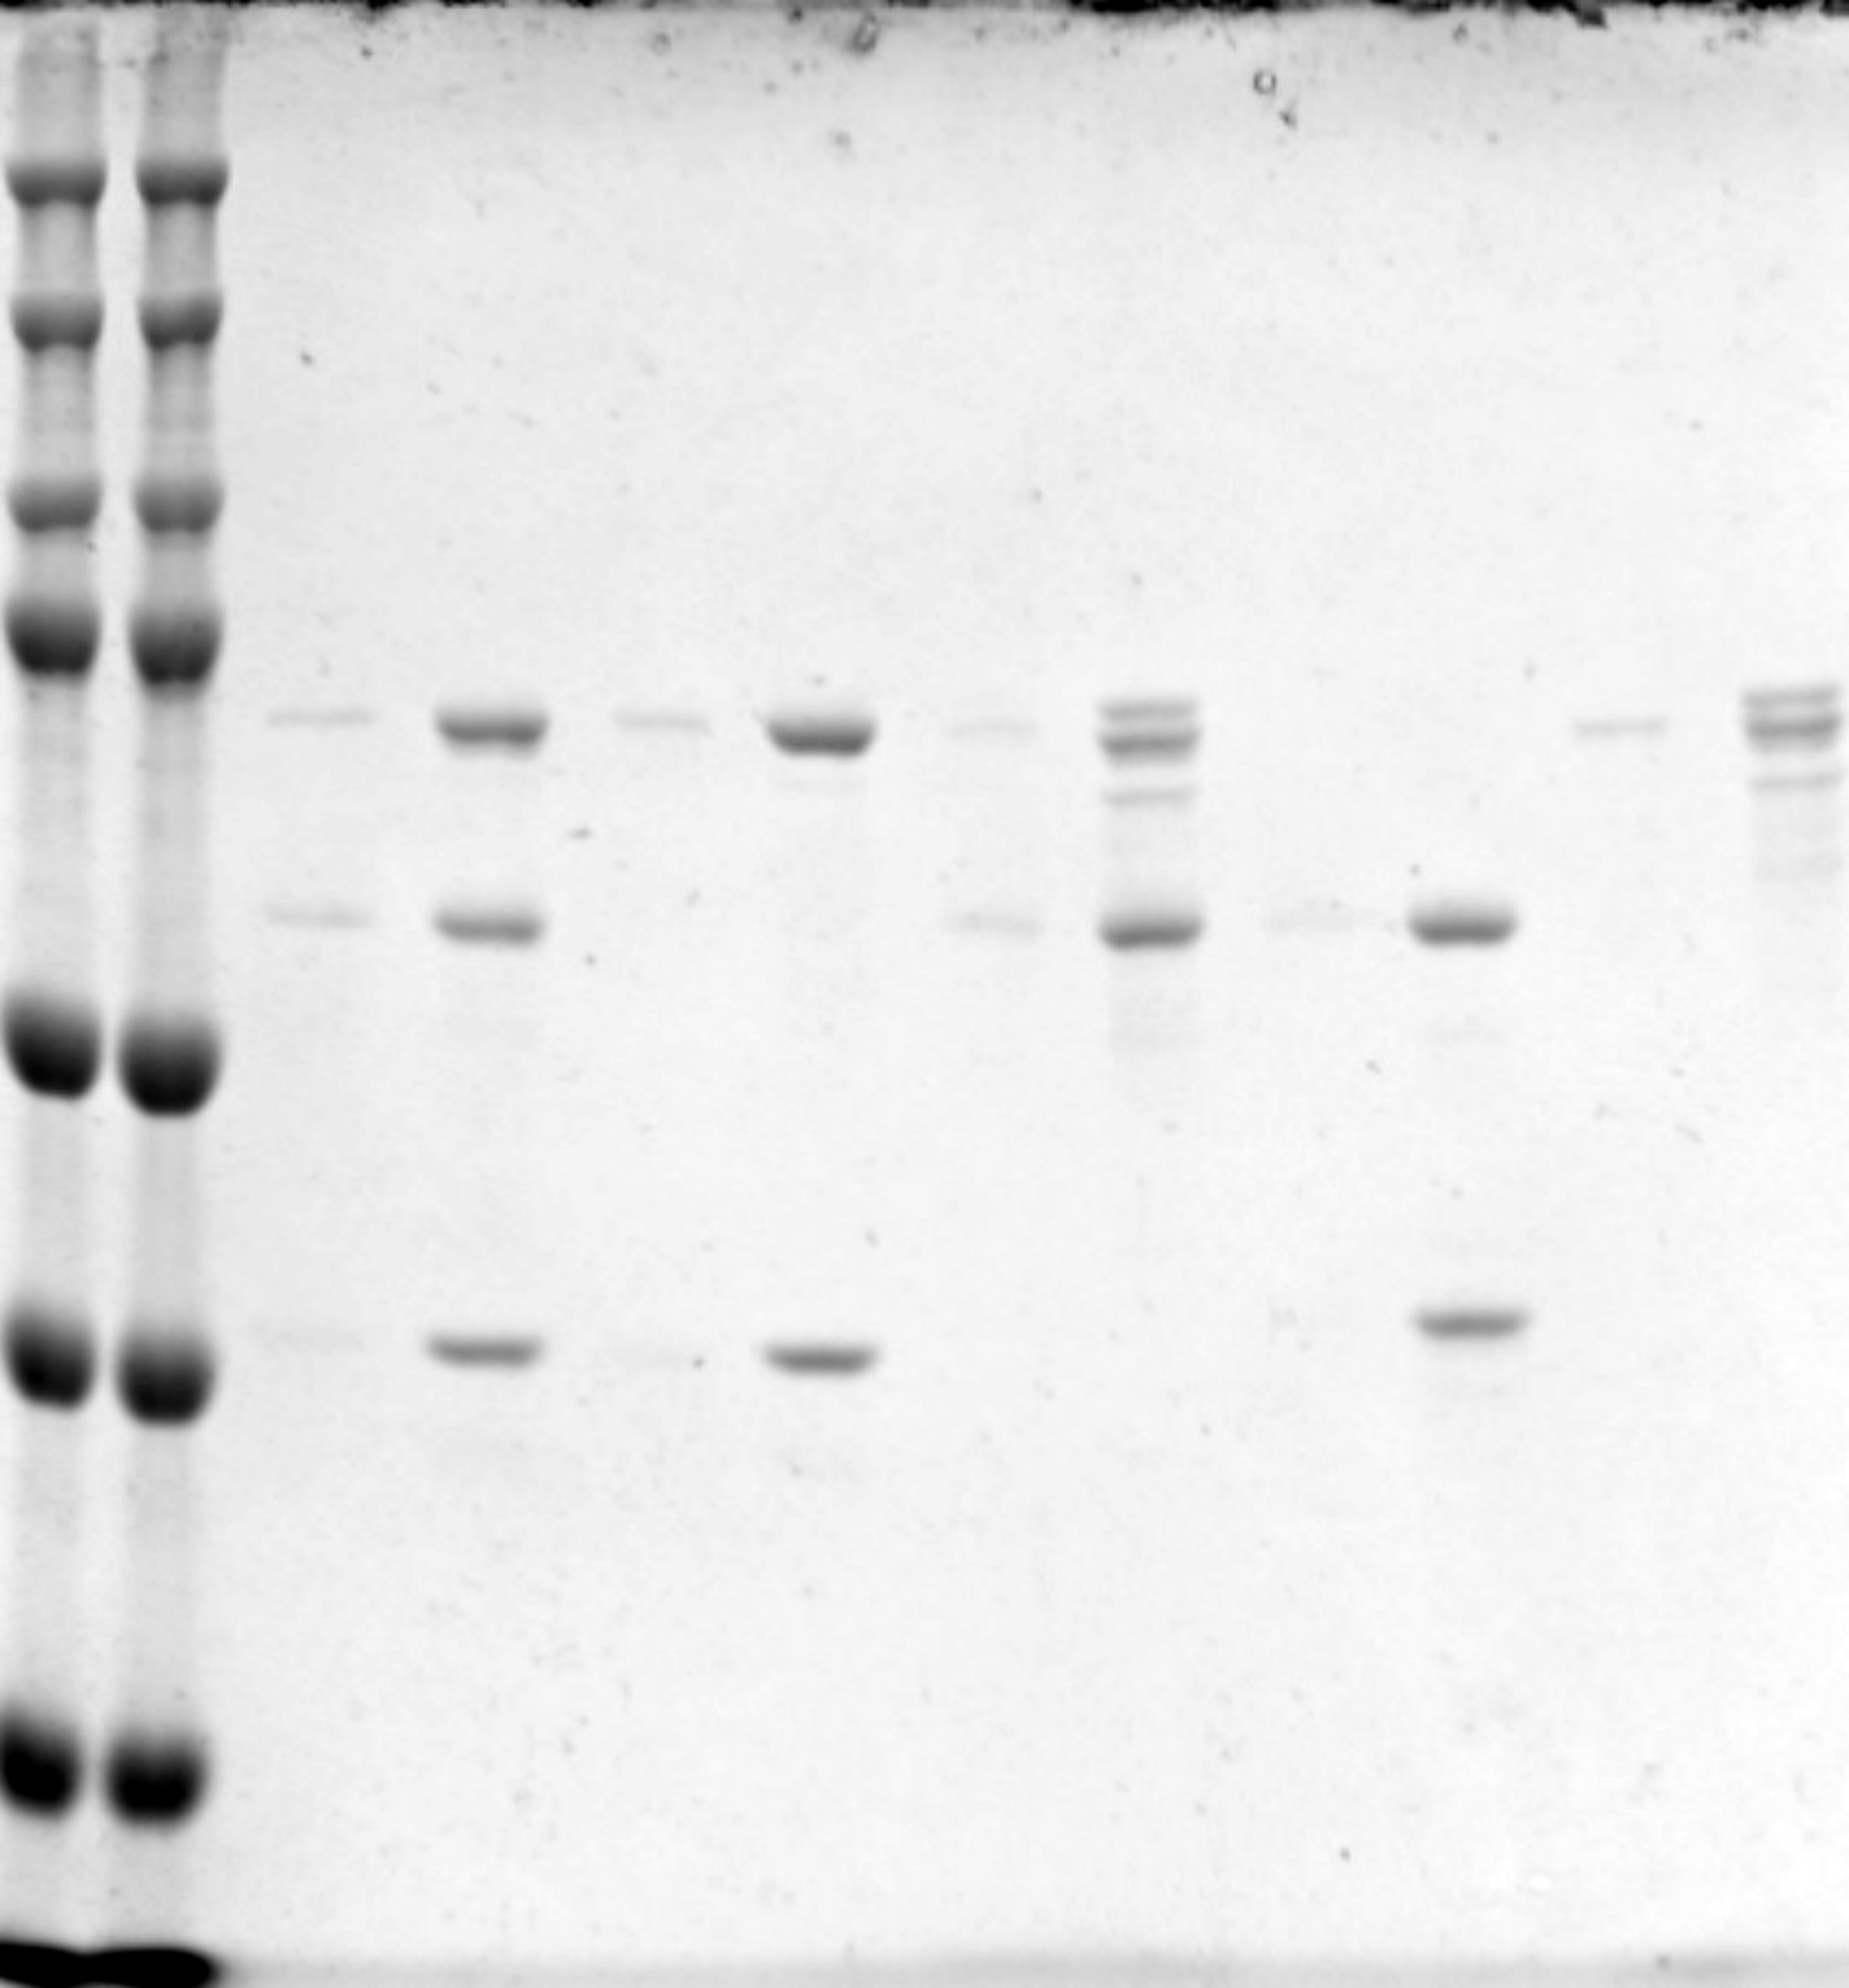

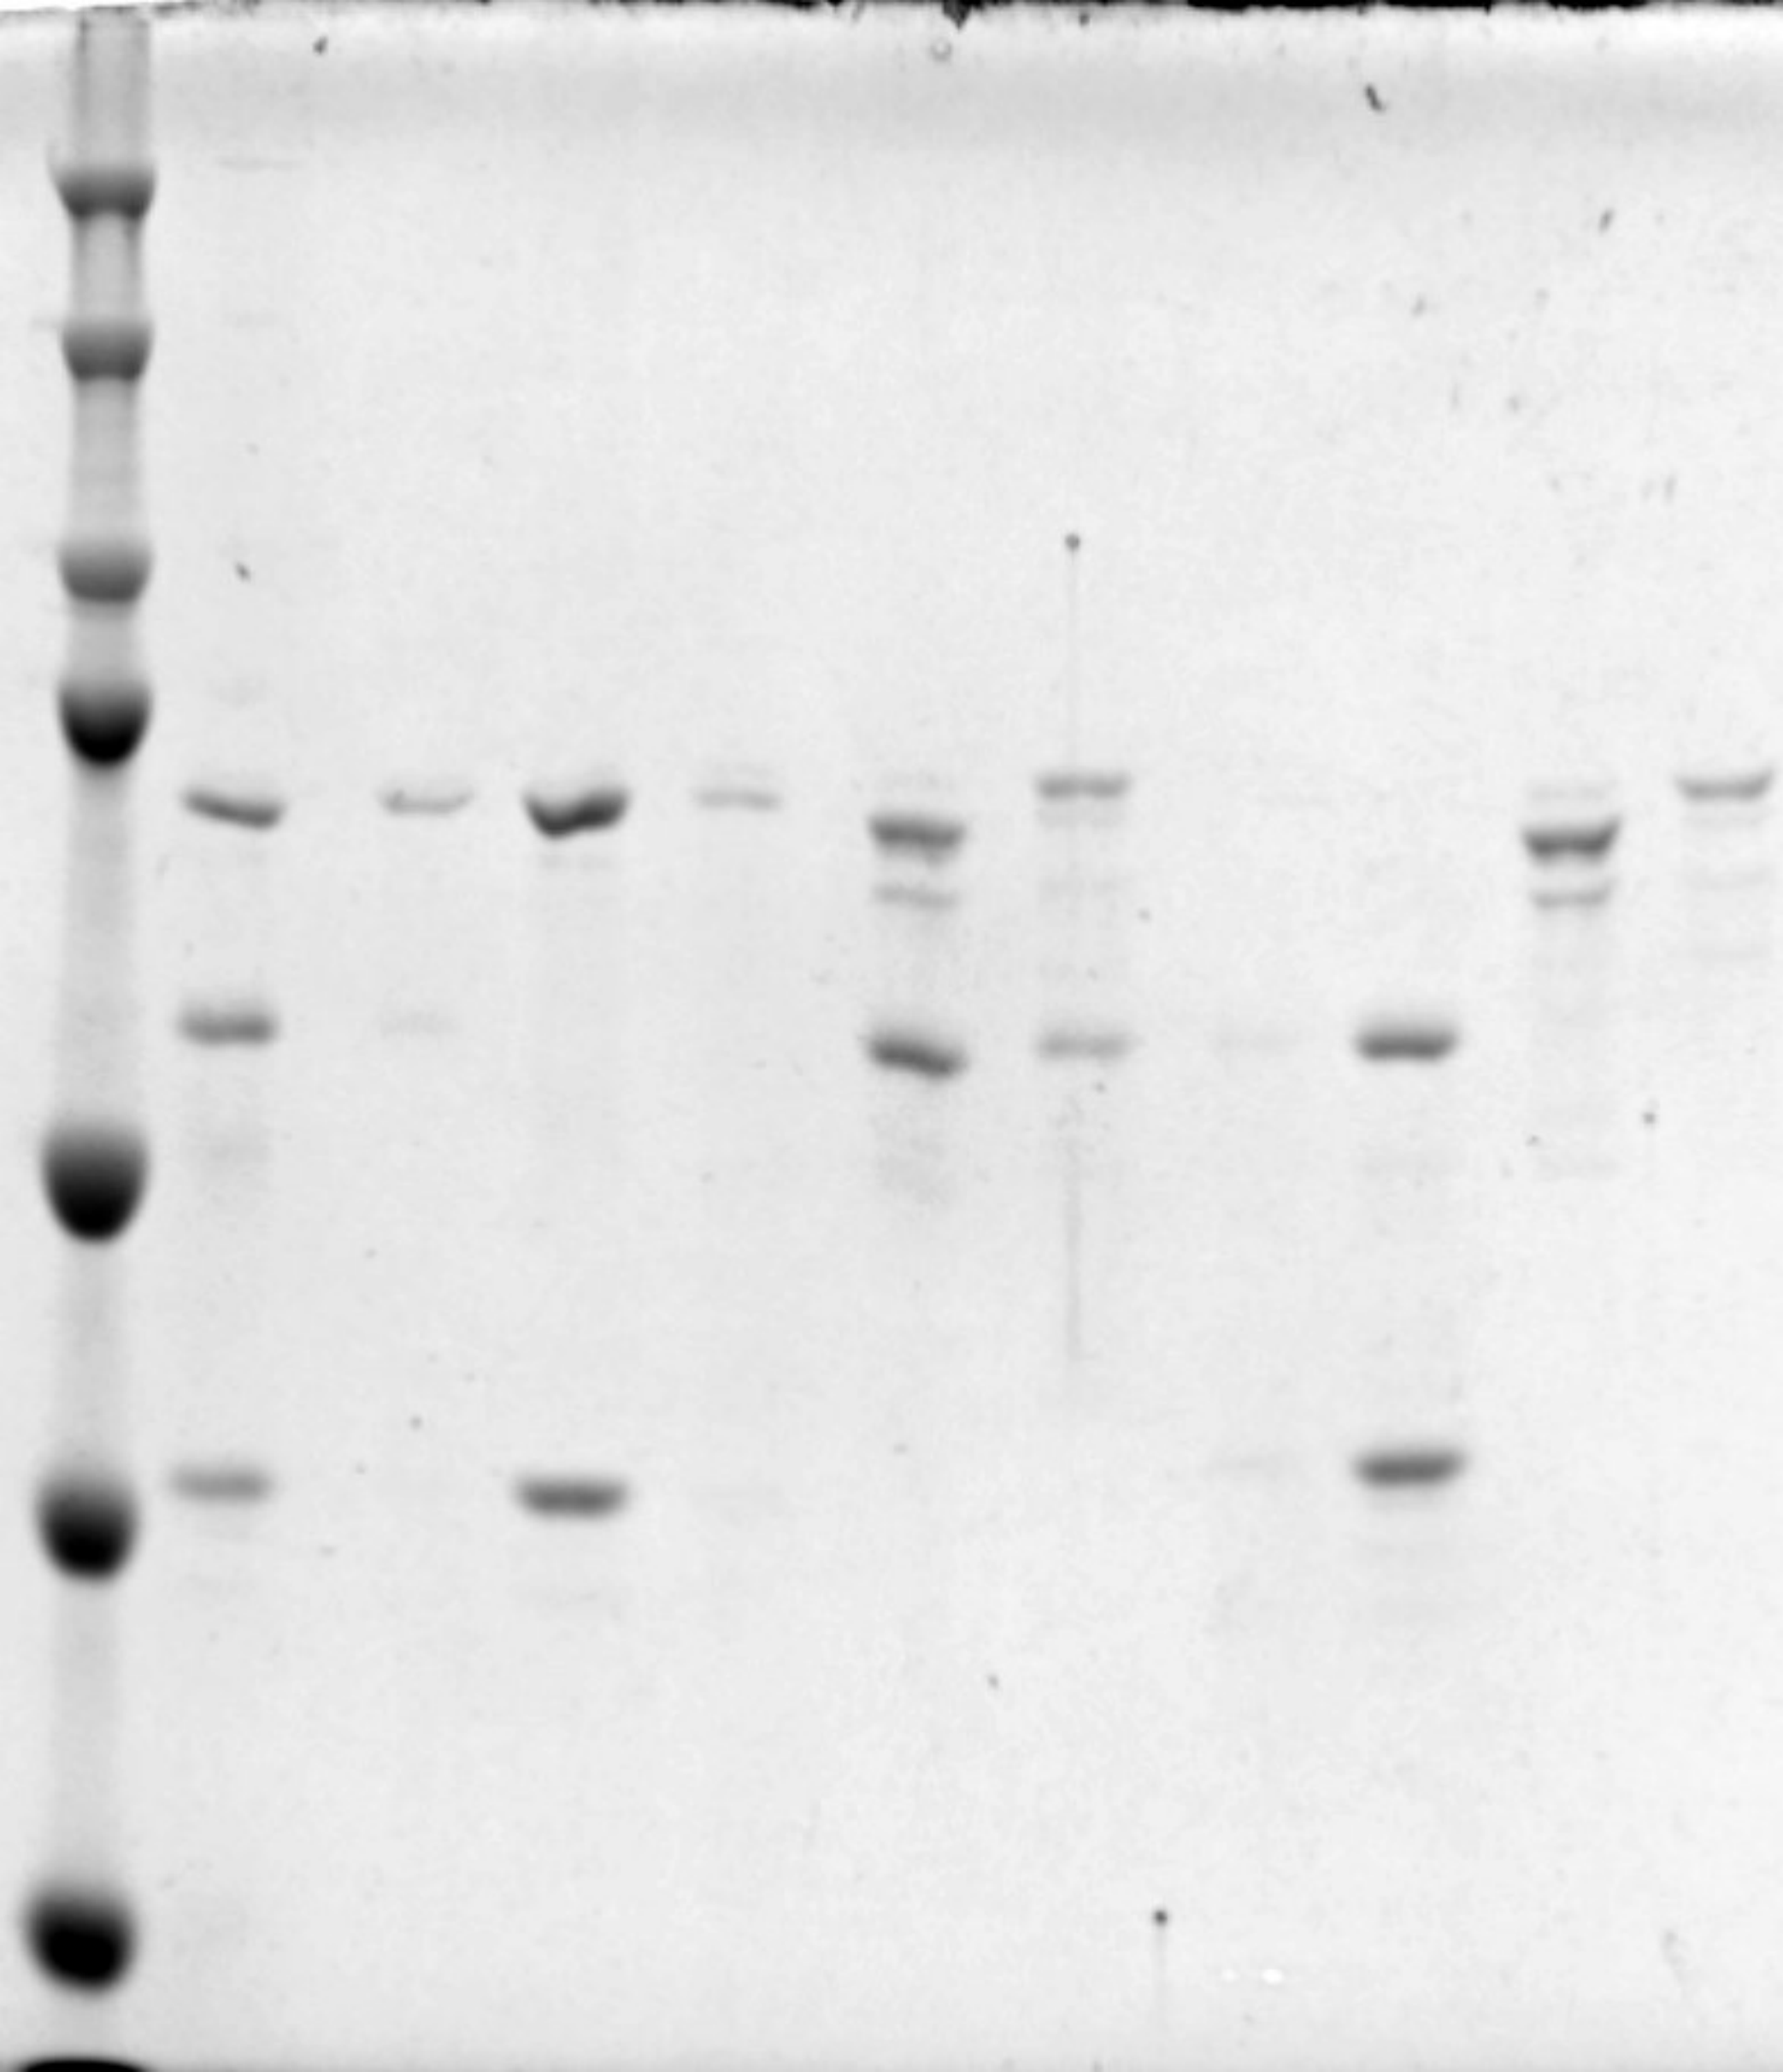

Supplement: 41556_2022_1035_MOESM14_ESM.pdf [file 41556_2022_1035_MOESM14_ESM.pdf]
